# Supplementary material
Source: PubMed Central journal article supplement (PMC6178112)
Supplement: 12250_2018_23_MOESM1_ESM.pdf [file 12250_2018_23_MOESM1_ESM.pdf]

## Electronic Supplementary Material

### Mechanisms and effects on HBV replication of the interaction between HBV core protein and cellular filamin B

Yilin Li<sup>1</sup>, Yishuang Sun<sup>1</sup>, Fuyun Sun<sup>1</sup>, Rong Hua<sup>1</sup>, Chenlin Li<sup>1</sup>, Lang Chen<sup>1</sup>, Deyin Guo<sup>1,3</sup>, Jingfang Mu<sup>2</sup>

1. School of Basic Medical Sciences, Wuhan University, Wuhan 430071, China.
2. State Key Laboratory of Virology, Wuhan Institute of Virology, Chinese Academy of Sciences, Wuhan 430071, China.
3. School of Basic Medicine (Shenzhen), Sun Yat-sen University, Guangzhou 510081, China.

Supporting information to DOI: 10.1007/s12250-018-0023-4

Supplementary Table S1. Primer sequences used in the construction of mutants

| Primer | Sequence (5'—3')                            |
|--------|---------------------------------------------|
| M1-F   | GAAACTACTGTTGTTGAAGAAGAGGACCGAGGCAGGTCC     |
| M1-R   | GGACCTGCCTCGGTCCTCTTCTTCAACAACAGTAGTTTC     |
| M2-F   | CGAGGCAGGTCCCCTGAAGAAGAACTCCCTCGCCTCGC      |
| M2-R   | GCGAGGCGAGGGAGTTTCTTCTTCAGGGGACCTGCCTCG     |
| M3-F   | CCCAAGCTTATGGACATTGACCCTTATAAAGAATTTGG      |
| M3-R   | CGGGGTACCCTAACATTGAGATTCCCGAGATTGAGA        |
| M4-F   | CCCAAGCTTATGGACATTGACCCTTATAAAGAATTTGG      |
| M4-R   | ACGCGGCGATTGAGATTTCGTCTTCGTCAGGCGAGGGAGTTCT |

Supplementary Table S2. Primer sequences used in quantitative real-time PCR

| Primer          | Sequence (5'—3')          |
|-----------------|---------------------------|
| HBV total RNA-F | GCACTTCGCTTCACCTCACCTCTGC |
| HBV total RNA-R | CTCAAGGTCGGTCGTTGACA      |
| HBV pgRNA-F     | TGTTCAAGCCTCCAAGCT        |
| HBV pgRNA-R     | GGAAAGAAGTCAGAAGGCAA      |
| GAPDH-F         | GAGAAGGCTGGGGCTCATTT      |
| GAPDH-R         | TAAGCAGTTGGTGGTGCAGG      |
